# Supplementary material
Source: publisher site journal article supplement (https://www.spandidos-publications.com/4056/downloadSupplementary)

Figure S1. Survival curve at 6 months after surgical resection was performed by median. High serum Wilms tumor 1-271 IgM levels tended to associate with unfavorable clinical outcome in the six months after the surgical resection. The P-value was obtained using a Log-Rank test.

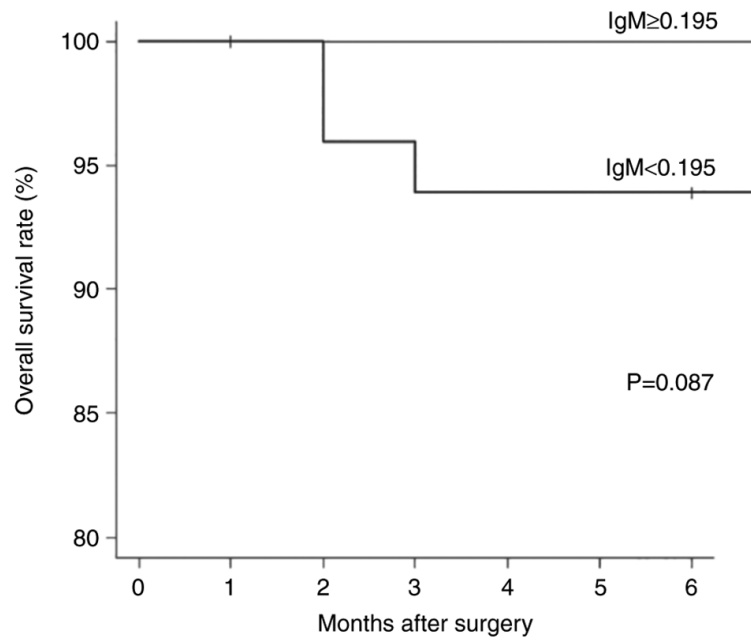

Supplement: Supplementary file 1 [file downloadSupplementary]
